# Supplementary material for: NAT10 promotes liver lipogenesis in mouse through N4-acetylcytidine modification of Srebf1 and Scap mRNA
Source: PubMed Central journal article supplement — Lipids Health Dis. 2024 Nov 11;23:368. doi: 10.1186/s12944-024-02360-1 (PMC11552140; doi:10.1186/s12944-024-02360-1), 2024-11-11
Supplement: 12944_2024_2360_MOESM1_ESM.pdf [file 12944_2024_2360_MOESM1_ESM.pdf]

**Supplementary Table 1 The sequences of primers for RT-qPCR or acRIP-PCR**

| Gene name                          | Primer sequence (5'-3')                |
|------------------------------------|----------------------------------------|
| Mouse <i>Nat10</i>                 | Forward:5'-GGGTAGCAACTCGGTGTCTT-3'     |
|                                    | Reverse:5'-GAAAAGCTATCACTGCGCCC-3'     |
| Mouse <i>Srebfl</i>                | Forward:5'-TGCAGTCTGCTTTGGAACCT-3'     |
|                                    | Reverse:5'-GATAGCATCTCCTGCGCACT-3'     |
| Mouse <i>Scap</i>                  | Forward:5'-GCCGCCTACATGGACTTCG-3'      |
|                                    | Reverse:5'-CACGAGTCATCCAGTCGGAA-3'     |
| Mouse <i>Acaca</i>                 | Forward:5'-CTCCCGATT CATAATTGGGTCTG-3' |
|                                    | Reverse:5'-TCGACCTTGTTTTACTAGGTGC-3'   |
| Mouse <i>Fasn</i>                  | Forward:5'-GGAGGTGGTGATAGCCGGTAT-3'    |
|                                    | Reverse:5'-TGGGTAATCCATAGAGCCCAG-3'    |
| Mouse <i>Fasn</i> for<br>acRIP-PCR | Forward:5'-TTCCAGTGTGACCAAGCACG-3'     |
|                                    | Reverse:5'-TAGAGCCCAGCCTTCCATCT -3'    |
| Mouse <i>Cebpb</i>                 | Forward:5'-GGCCGACTACGGTTACGTG-3'      |
|                                    | Reverse:5'-CTCAGCTTGTCCACCGTCTT-3'     |
| Mouse <i>Gapdh</i>                 | Forward:5'-AGGTCGGTGTGAACGGATTTG-3'    |
|                                    | Reverse:5'-GGTGA CTCAGCTATTCCGGG-3'    |
| Human <i>SREBF1</i>                | Reverse:5'-CAGCCTTGAAGGAGTGCAGA-3'     |
|                                    | Reverse:5'-GGGGTCGTTGATGGCAACA-3'      |
| Human <i>FASN</i>                  | Reverse:5'-TCATCCGCCTTTGAGGACAG-3'     |
|                                    | Forward:5'-GGAGCGAGATCCCTCCAAAAT-3'    |
| Human <i>GAPDH</i>                 | Reverse:5'-GGCTGTTGTCATACTTCTCATGG-3'  |
